# Supplementary material for: Prevalence and risk factors of musculoskeletal injuries in modern and contemporary dancers: a systematic review and meta-analysis
Source: Frontiers journal article supplement (doi:10.3389/fpubh.2024.1325536), 2024-02-28
Supplement: Data_Sheet_1.PDF [file Data_Sheet_1.PDF]

Table 1 Basic information of the included literature

| Publication<br>year<br>Study<br>Country                    | Follow up and<br>months/weeks<br>of training year | Age<br>(years)<br>[mean±SD] | Number<br>(F/M) | Genre                   | Level                   | Injury<br>definition                                                                                                                                     |
|------------------------------------------------------------|---------------------------------------------------|-----------------------------|-----------------|-------------------------|-------------------------|----------------------------------------------------------------------------------------------------------------------------------------------------------|
| 2003<br>Bronner et al <sup>[10]</sup><br>America           | 5 prospective<br>training years<br>195 weeks      | 24±2.6                      | 42<br>(21/21)   | Modern                  | Professional<br>dancers | Any musculoskeletal<br>complaint resulting in<br>finical outlay.<br>(overuse, trauma)                                                                    |
| 2011<br>Ojofeitimi &<br>Bronner <sup>[11]</sup><br>America | 8 prospective<br>training years<br>328 weeks      | 27.3±0.3                    | 87              | Modern                  | Professional<br>dancers | Any musculoskeletal<br>complaint resulting in<br>finical outlay.<br>(time-loss<br>injury,overuse,trauma)                                                 |
| 2012<br>Selina et al <sup>[13]</sup><br>America            | 1 prospective<br>training year<br>24 weeks        | 30.1±7.3                    | 184<br>(135/49) | Modern                  | Professional<br>dancers | Medical problems<br>occurred as a result of<br>participation in class,<br>rehearsal,performance                                                          |
| 2016<br>Bronner<br>&Wood <sup>[22]</sup><br>America        | 1 prospective<br>training year<br>23 weeks        | 29.06±5.57                  | 35<br>(18/17)   | Modern                  | Professional<br>dancers | WMSI(find the physical<br>therapist)<br>Time-loss injury(cannot<br>dance for several days)<br>Complaints(not TLinj or<br>WMSI,including MAC<br>and TCBC) |
| 2016<br>Jacobs et al <sup>[4]</sup><br>Canada              | 1 prospective<br>training year<br>41 weeks        | 25±4.0                      | 82              | Ballet<br>And<br>modern | Professional<br>dancers | Self-reported injury<br>Self-estimated<br>functional inability<br>because of pain                                                                        |

|                                                        |                                            |          |                |                         |                          |                                                                        |
|--------------------------------------------------------|--------------------------------------------|----------|----------------|-------------------------|--------------------------|------------------------------------------------------------------------|
| 2017<br>van Seters et al <sup>[7]</sup><br>Netherlands | 1 prospective training year<br>10 months   | 18.6±1.1 | 45<br>(28/17)  | Contemporary            | Pre-professional dancers | Self-reported injury<br>(use OSTRC: Questionnaire on Health Problems)  |
| 2017<br>Kenny et al <sup>[14]</sup><br>Canada          | 1 cross-sectional training year            | 23.5±6.5 | 65<br>(63/2)   | Ballet and contemporary | Pre-professional dancers | Self-reported injury(a baseline questionnaire)                         |
| 2018<br>Bronner & Bauer <sup>[15]</sup><br>America     | 4 prospective training years<br>136 weeks  | 18.2±0.7 | 180            | Modern                  | Pre-professional dancers | Self-reported injury(a questionnaire and the same physical therapists) |
| 2018<br>Cahalan et al <sup>[17]</sup><br>Ireland       | 1 prospective training year<br>48 weeks    | 21.0±3.1 | 29<br>(28/1)   | Contemporary            | Pre-professional dancers | Self-reported injury(a questionnaire)                                  |
| 2018<br>Bronner et al <sup>[15]</sup><br>America       | 15 prospective training years<br>555 weeks | 25.2±0.8 | 159            | Modern                  | Professional dancers     | Time-loss injury<br>Medical-attention injury<br>All-complaints injury  |
| 2018<br>Kenny et al <sup>[16]</sup><br>Canada          | 1 prospective training year<br>10 months   | 17.9±6.6 | 60<br>(58/2)   | Ballet and contemporary | Pre-professional dancers | Work-related musculoskeletal injuries(WMSI)<br>Time-loss injury        |
| 2019<br>van Winden <sup>[24]</sup><br>Netherlands      | 1 prospective training year<br>10 months   | 19.4±1.5 | 134<br>(90/44) | Contemporary            | Pre-professional dancers | Self-reported injury<br>(use OSTRC: Questionnaire on Health Problems)  |
| 2020<br>Jeffries et al <sup>[25]</sup><br>Australia    | 1 prospective training year                | 26.1±5.1 | 16<br>(9/7)    | Contemporary            | Professional dancers     | Medical-attention injury<br>Time-loss injury                           |

|                                                         |                                              |          |                   |                   |                                 |                                                                             |
|---------------------------------------------------------|----------------------------------------------|----------|-------------------|-------------------|---------------------------------|-----------------------------------------------------------------------------|
| 2020<br>van Winden et al <sup>[8]</sup><br>Netherlands  | 1 prospective<br>training year<br>10 months  | 19.2±1.5 | 99<br>( 71/28 )   | Contem-<br>porary | Pre-<br>professional<br>dancers | Self-reported injury<br>(use OSTRC:<br>Questionnaire on Health<br>Problems) |
| 2021<br>van Rijn et al <sup>[9]</sup><br>Netherlands    | 1 prospective<br>training year<br>10 months  | 19.1±1.3 | 195<br>( 127/68 ) | Contem-<br>porary | Pre-<br>professional<br>dancers | Self-reported injury<br>(use OSTRC:<br>Questionnaire on Health<br>Problems) |
| 2021<br>van Winden et al <sup>[26]</sup><br>Netherlands | 1 prospective<br>training year<br>10 months  | 22.8±5.8 | 186<br>( 127/59 ) | Contem-<br>porary | Pre-<br>professional<br>dancers | Self-reported injury<br>(use OSTRC:<br>Questionnaire on Health<br>Problems) |
| 2021<br>Bronner et al <sup>[18]</sup><br>America        | 4 prospective<br>training years<br>40 months | 18.2±0.7 | 180<br>( 140/40 ) | Modern            | Pre-<br>professional<br>dancers | Medical attention<br>injury(MAI )<br>Time-loss injury(TLI)                  |
| 2021<br>Adinda K et al <sup>[6]</sup><br>Netherlands    | 1 prospective<br>training year<br>10 months  | 19.2±1.5 | 91<br>( 64/27 )   | Contem-<br>porary | Pre-<br>professional<br>dancers | Self-reported injury<br>(use OSTRC:<br>Questionnaire on Health<br>Problems) |

---
